# Supplementary material
Source: PubMed Central journal article supplement (PMC7757600)
Supplement: NIHMS1636506-supplement-1.pdf [file NIHMS1636506-supplement-1.pdf]

## Supplementary Information

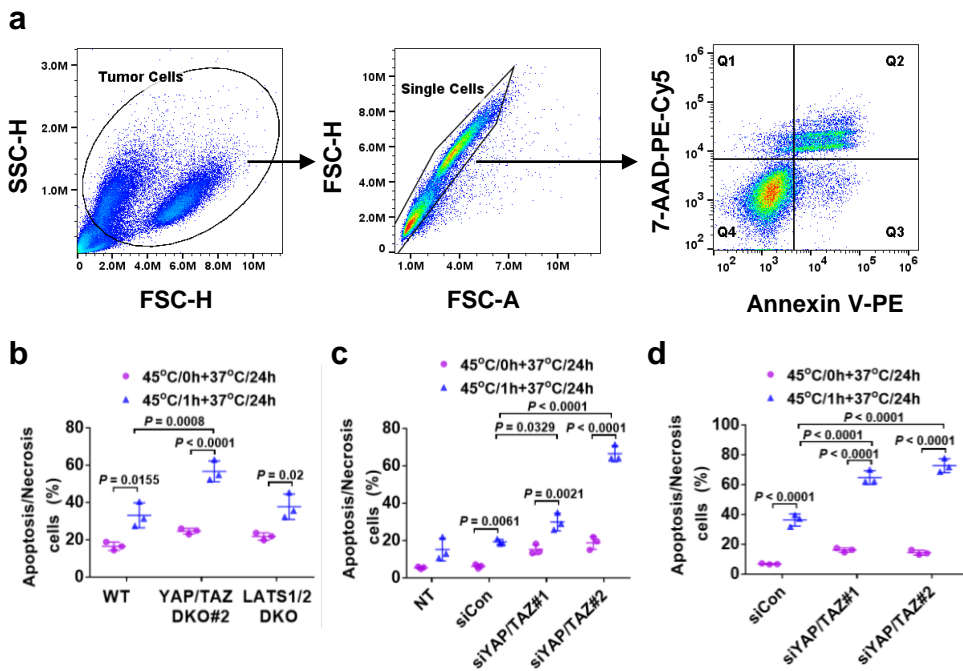

**Supplementary Figure 1:** (a) Representative gating strategy for flow cytometry used to quantify the ratio of Annexin V<sup>+</sup> apoptosis/necrosis cells in Fig. 6d and Extended data Fig. 5c&g. (b-d) The quantitative data of FCM results for Fig. 6d and Extended data Fig. 5c&g respectively. Data are mean  $\pm$  s.d.; n = 3 biologically independent samples. Two-way ANOVA test.
